# Supplementary material for: Electronic and interfacial behavior of gemini metallosurfactants with copper(ii)/pseudohalide cascade cores
Source: Royal Society of Chemistry journal article supplement (doi:10.1039/c3dt50788b), 2013-01-01
Supplement: c3dt50788b.pdf [file c3dt50788b.pdf]

## Supporting Information

### Electronic and interfacial behavior of gemini metallosurfactants with copper(II)/pseudohalide cascade cores

Cláudio N. Verani,\* Rama Shanmugam, Fernando R. Xavier, Marco M. Allard, Kenneth Kwame Kpogo

Department of Chemistry, Wayne State University - Detroit, MI 48202

1. **Figure S1.** Infrared spectra of **1** and **2** (KBr pellets).
2. **Figure S2.** a) Comparison between the electronic spectra for the precursor  $[\text{Cu}(\text{L}^{\text{PY18}})\text{Br}_2]$ , **1**, **2**; (b) Spectral changes for **1**,  $1.0 \times 10^{-4}$  M, in pyridine/dichloromethane 50% v/v solution, followed for 3 hours. A similar behavior was found for **2**.
3. **Figure S3.** IRRAS spectra of the LB films of **2** with p-polarized light at an angle of incidence  $30^\circ$ .
4. **Figure S4.** IR spectra of the ground LB films of **1** and **2** on gold coated glass plates.
5. **Table T1.** Bond lengths and angles for **2**.
6. **Table T2.** DFT Cartesian Coordinates.

**Figure S1.** Infrared spectra of **1** (left) and **2** (right) in bulk from KBr pellets.

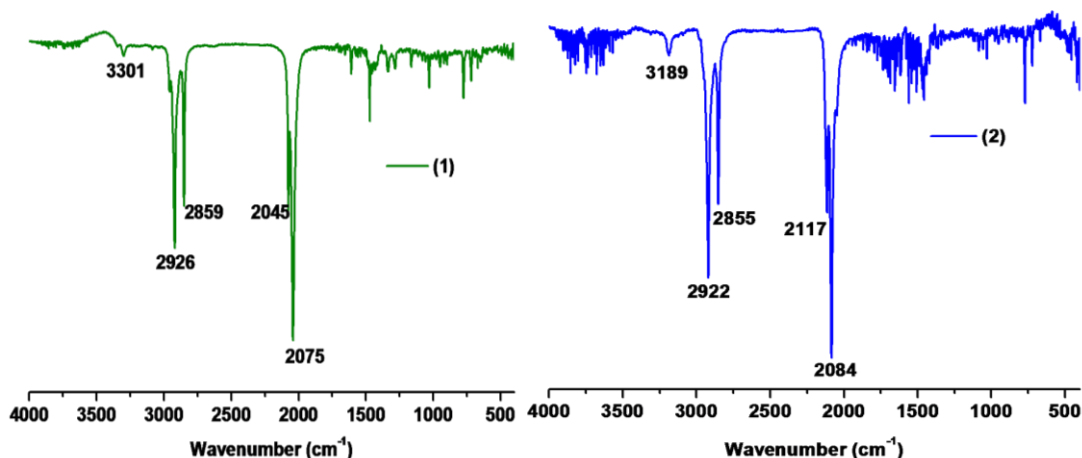

**Figure S2.** (a) Comparison between the electronic spectra for the precursor  $[\text{Cu}(\text{L}^{\text{PY18}})\text{Br}_2]$ , **1**, **2**; (b) Spectral changes for **1**,  $1.0 \times 10^{-4}$  M, in pyridine/dichloromethane 50% v/v solution, followed for 3 hours. A similar behavior was found for **2**.

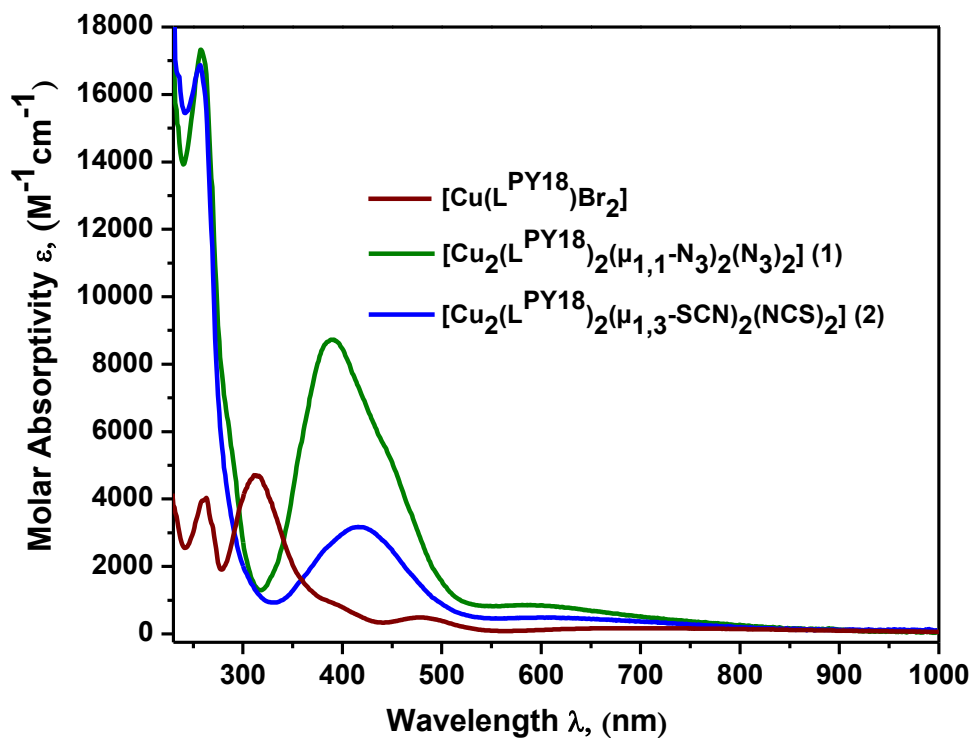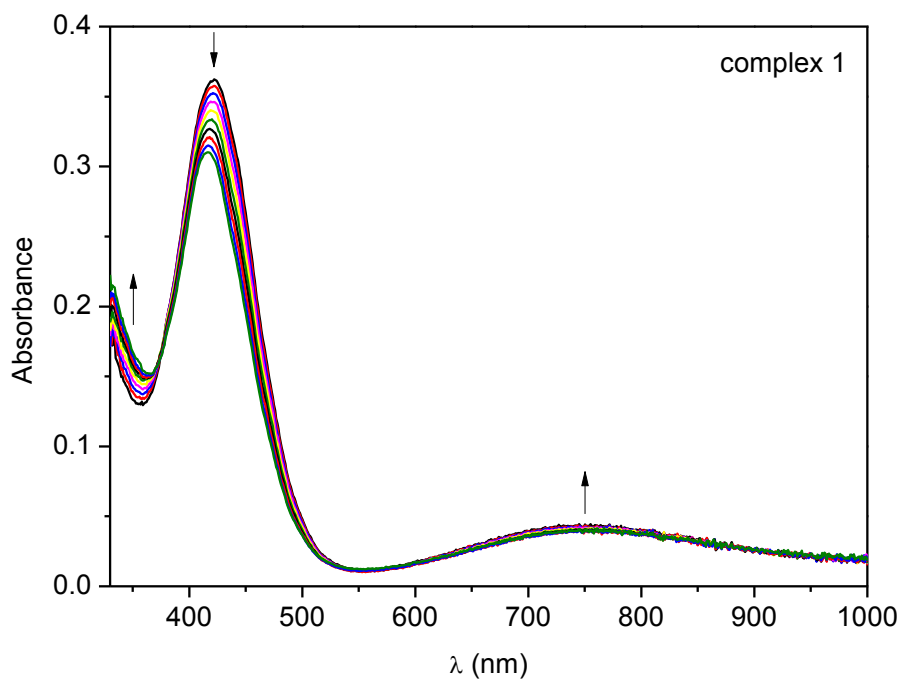

**Figure S3.** IRRAS spectra of the LB films of **2** with p-polarized light at an angle of incidence 30 °.

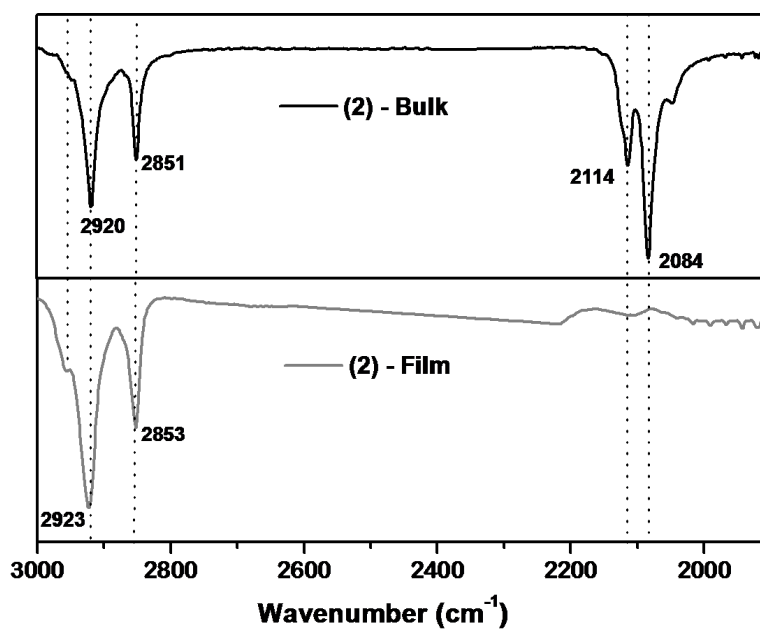

**Figure S4.** IR spectra of the ground LB films of **1** and **2** on gold coated glass plates.

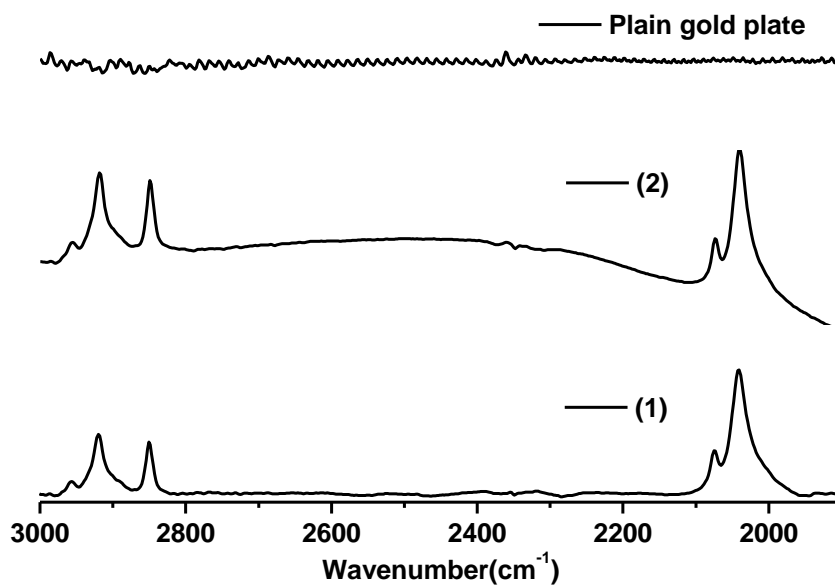

**Table T1.** Bond lengths and angles for **2**. CCDC 948258 contains the supplementary crystallographic data for this paper.

|                     |                        |                        |
|---------------------|------------------------|------------------------|
| Bond lengths (Å)    | C8—C9 1.539 (10)       | C23—C22—C21 114.0 (18) |
| N3—C25 1.168 (12)   | C1K—C1L 1.56 (3)       | C5—N1—Cu1 115.3 (7)    |
| C15—C16 1.5400 (10) | C9—C10 1.541 (10)      | C22—C23—C24 103 (3)    |
| N3—Cu1 1.932 (9)    | C1L—C1M 1.51 (3)       | N1—C1—C2 123.0 (9)     |
| C16—C17 1.5400 (10) | C10—C11 1.538 (10)     | N2—C1A—C1B 114.2 (15)  |
| C25—S1 1.628 (10)   | C1M—C1N 1.53 (3)       | C1—C2—C3 118.2 (10)    |
| C17—C18 1.5400 (10) | C11—C12 1.537 (10)     | C1C—C1B—C1A 112 (2)    |
| N4—C26 1.165 (12)   | C1N—C1O 1.52 (3)       | C4—C3—C2 119.1 (9)     |
| C18—C19 1.5400 (10) | C12—C13 1.541 (10)     | C1D—C1C—C1B 110 (2)    |
| N4—Cu1 1.961 (8)    | C1O—C1P 1.54 (3)       | C3—C4—C5 118.6 (9)     |
| C19—C20 1.5400 (10) | C13—C14 1.543 (10)     | C1C—C1D—C1E 111 (2)    |
| C26—S2 1.640 (10)   | C1P—C1Q 1.54 (3)       | N1—C5—C4 123.0 (10)    |
| C20—C21 1.5400 (10) | C14—C15 1.5400 (10)    | C1D—C1E—C1F 112 (2)    |
| Cu1—N1 2.004 (8)    | C1Q—C1R 1.59 (5)       | N1—C5—C6 113.8 (8)     |
| C21—C22 1.5400 (10) |                        | C1G—C1F—C1E 113 (2)    |
| Cu1—N2 2.041 (9)    | Bond Angles (°)        | C4—C5—C6 123.2 (9)     |
| C22—C23 1.5400 (11) | C25—N3—Cu1 167.9 (8)   | C1H—C1G—C1F 113 (2)    |
| N1—C1 1.327 (13)    | C12—C11—C10 110.8 (18) | N2—C6—C5 107.2 (9)     |
| C23—C24 1.5400 (11) | N3—C25—S1 178.6 (12)   | C1I—C1H—C1G 113 (2)    |
| N1—C5 1.327 (11)    | C11—C12—C13 112.9 (17) | C6—N2—Cu1 106.1 (7)    |
| C1A—C1B 1.53 (2)    | C26—N4—Cu1 168.9 (9)   | C1H—C1I—C1J 114.4 (19) |
| C1—C2 1.375 (13)    | C12—C13—C14 111.0 (17) | C6—N2—C1A 111.0 (11)   |
| C1B—C1C 1.51 (4)    | N4—C26—S2 177.7 (10)   | C1K—C1J—C1I 112 (2)    |
| C2—C3 1.382 (14)    | C15—C14—C13 111.3 (15) | C7—N2—Cu1 124 (2)      |
| C1C—C1D 1.50 (3)    | N3—Cu1—N4 95.8 (3)     | C1J—C1K—C1L 112.4 (19) |
| C3—C4 1.366 (15)    | C16—C15—C14 111.2 (15) | C7—N2—C6 114 (3)       |
| C1D—C1E 1.54 (3)    | N3—Cu1—N1 160.5 (4)    | C1M—C1L—C1K 113 (2)    |
| C4—C5 1.375 (12)    | C15—C16—C17 110.5 (13) | C7—N2—C1A 10 (3)       |
| C1E—C1F 1.57 (3)    | N3—Cu1—N2 92.1 (3)     | C1L—C1M—C1N 112 (2)    |
| C5—C6 1.507 (14)    | C16—C17—C18 111.7 (15) | C1A—N2—Cu1 118.7 (8)   |
| C1F—C1G 1.52 (3)    | N4—Cu1—N1 92.6 (3)     | C1M—C1N—C1O 112 (2)    |
| C6—N2 1.468 (14)    | C19—C18—C17 113.3 (14) | N2—C7—C8 120 (5)       |
| C1G—C1H 1.52 (3)    | N4—Cu1—N2 171.3 (3)    | C1P—C1O—C1N 116 (2)    |
| N2—C7 1.24 (6)      | C18—C19—C20 111.0 (15) | C9—C8—C7 126 (3)       |
| C1H—C1I 1.51 (3)    | N1—Cu1—N2 78.8 (3)     | C1Q—C1P—C1O 116 (2)    |
| N2—C1A 1.509 (19)   | C21—C20—C19 109.8 (14) | C8—C9—C10 113 (2)      |
| C1I—C1J 1.54 (3)    | C1—N1—Cu1 126.9 (6)    | C1P—C1Q—C1R 118 (4)    |
| C7—C8 1.5400 (10)   | C20—C21—C22 114.7 (16) | C11—C10—C9 111.4 (18)  |
| C1J—C1K 1.51 (3)    | C1—N1—C5 117.9 (8)     |                        |

**Table T2. Cartesian Coordinates:**

**(1) Cu<sub>2</sub> (Azide: Side on) : E = -2999385.01724921 a.u.**  
**(S= 2/2)**

|    |             |             |             |
|----|-------------|-------------|-------------|
| N  | -2.11533700 | -2.38800200 | 1.57516900  |
| N  | -1.10937300 | -2.81785700 | 2.06911900  |
| N  | -0.16221200 | -3.27470400 | 2.55995500  |
| Cu | -2.37366200 | -0.65869300 | 0.71951800  |
| N  | -4.04043500 | -1.39017900 | -0.23452100 |
| C  | -4.63040400 | -0.29228800 | -1.01386800 |
| C  | -3.79354700 | -2.61797800 | -1.02086500 |
| H  | -4.67348700 | -1.62666900 | 0.52998900  |
| C  | -4.50012000 | 0.99853200  | -0.25183800 |
| H  | -5.67620300 | -0.47775700 | -1.28110300 |
| H  | -4.06031100 | -0.21062600 | -1.94766800 |
| C  | -5.04463100 | -3.25812600 | -1.60922300 |
| H  | -3.07997500 | -2.35152800 | -1.80654800 |
| H  | -3.28686200 | -3.30818300 | -0.34196700 |
| N  | -3.46495500 | 1.05408400  | 0.60273800  |
| C  | -5.35998800 | 2.07807800  | -0.43340600 |
| H  | -5.53621400 | -2.61628000 | -2.34669400 |
| H  | -4.77337600 | -4.18992400 | -2.11472800 |
| H  | -5.77211500 | -3.50474700 | -0.82785500 |
| C  | -3.24457800 | 2.17863700  | 1.29864600  |
| C  | -5.13013500 | 3.24699300  | 0.28600100  |
| H  | -6.19141100 | 1.99872100  | -1.12607800 |
| H  | -2.38895300 | 2.15185900  | 1.96590800  |
| C  | -4.05394300 | 3.29932400  | 1.16951400  |
| H  | -5.78547000 | 4.10368800  | 0.16216300  |
| H  | -3.84229200 | 4.18935600  | 1.75154400  |
| N  | -0.98015100 | 0.23980000  | 1.81346300  |
| N  | 0.15064500  | 0.37488800  | 1.48082600  |
| N  | 1.27143500  | 0.52338300  | 1.18511300  |
| Cu | 2.37350600  | 0.65863600  | -0.71926900 |
| N  | 2.11462700  | 2.38814500  | -1.57437500 |
| N  | 1.10864400  | 2.81772300  | -2.06859500 |
| N  | 0.16144300  | 3.27432800  | -2.55963700 |
| N  | 4.04021100  | 1.39030700  | 0.23473700  |
| C  | 4.63065400  | 0.29236400  | 1.01365100  |
| C  | 3.79306900  | 2.61779100  | 1.02149300  |
| H  | 4.67306200  | 1.62723600  | -0.52980400 |
| C  | 4.50058800  | -0.99827700 | 0.25128400  |
| H  | 5.67645300  | 0.47805500  | 1.28073100  |
| H  | 4.06077400  | 0.21026600  | 1.94754200  |
| C  | 5.04405200  | 3.25814400  | 1.60983800  |
| H  | 3.28606600  | 3.30804600  | 0.34288100  |
| H  | 3.07970300  | 2.35088600  | 1.80720800  |
| N  | 3.46527900  | -1.05388500 | -0.60311200 |
| C  | 5.36079400  | -2.07763300 | 0.43239600  |
| H  | 5.53595200  | 2.61623000  | 2.34703900  |
| H  | 5.77133300  | 3.50520900  | 0.82842200  |
| H  | 4.77260300  | 4.18971100  | 2.11566200  |
| C  | 3.24508500  | -2.17831100 | -1.29928000 |
| C  | 5.13112800  | -3.24641900 | -0.28728000 |
| H  | 6.19233100  | -1.99822800 | 1.12492500  |

|   |             |             |             |
|---|-------------|-------------|-------------|
| H | 2.38933400  | -2.15159000 | -1.96638100 |
| C | 4.05478100  | -3.29881100 | -1.17059900 |
| H | 5.78672500  | -4.10296500 | -0.16379700 |
| H | 3.84326500  | -4.18874600 | -1.75282600 |
| N | 0.98011800  | -0.23986300 | -1.81334600 |
| N | -0.15057400 | -0.37547100 | -1.48057500 |
| N | -1.27125800 | -0.52448200 | -1.18475500 |

**(1) Cu<sub>2</sub> (Azide: End on) : E = -2999387.49535079 a.u.**  
**(S= 2/2)**

|    |             |             |             |
|----|-------------|-------------|-------------|
| N  | 0.69813700  | 2.08373300  | 1.94801800  |
| N  | -0.40661600 | 2.45513500  | 2.23692900  |
| N  | -1.45160800 | 2.85286800  | 2.54780000  |
| Cu | 1.23906700  | 0.63833700  | 0.75221800  |
| N  | 2.86966800  | 1.75984300  | 0.21776300  |
| C  | 3.83733900  | 0.90588400  | -0.48728400 |
| C  | 2.54941500  | 3.02381500  | -0.48073900 |
| H  | 3.25440900  | 2.00524800  | 1.13072400  |
| C  | 3.80836200  | -0.48374700 | 0.09283500  |
| H  | 4.85441600  | 1.31137900  | -0.45974800 |
| H  | 3.53554100  | 0.85708000  | -1.54109900 |
| C  | 3.72272800  | 3.98683300  | -0.61063300 |
| H  | 2.15659300  | 2.76246200  | -1.46742900 |
| H  | 1.73808400  | 3.48271200  | 0.08991100  |
| N  | 2.64049000  | -0.85148100 | 0.64629200  |
| C  | 4.89699300  | -1.34883400 | 0.03172200  |
| H  | 4.52816400  | 3.58138100  | -1.23051900 |
| H  | 3.38319200  | 4.91554400  | -1.07890200 |
| H  | 4.13722500  | 4.24200300  | 0.37088800  |
| C  | 2.51016800  | -2.09111900 | 1.13934500  |
| C  | 4.76254600  | -2.63419400 | 0.54795400  |
| H  | 5.82886800  | -1.01672000 | -0.41404900 |
| H  | 1.53831700  | -2.32954200 | 1.55802500  |
| C  | 3.54629900  | -3.01485100 | 1.11070200  |
| H  | 5.59667100  | -3.32818500 | 0.51308200  |
| H  | 3.39879400  | -4.00711400 | 1.52217500  |
| N  | -0.24558100 | -0.58830600 | 1.21574700  |
| N  | -0.71295200 | -0.73399600 | 2.31858100  |
| N  | -1.18085700 | -0.90817800 | 3.36027900  |
| Cu | -1.23907300 | -0.63851000 | -0.75142600 |
| N  | -0.69929800 | -2.08447800 | -1.94721200 |
| N  | 0.40506200  | -2.45878800 | -2.23343100 |
| N  | 1.44966700  | -2.85917900 | -2.54186700 |
| N  | -2.87090900 | -1.75841100 | -0.21731700 |
| C  | -3.83898500 | -0.90324100 | 0.48571600  |
| C  | -2.55231500 | -3.02190700 | 0.48279700  |
| H  | -3.25471500 | -2.00450800 | -1.13049300 |
| C  | -3.80826700 | 0.48592100  | -0.09533500 |
| H  | -4.85620000 | -1.30805900 | 0.45703200  |
| H  | -3.53870600 | -0.85386600 | 1.53985400  |
| C  | -3.72657900 | -3.98381300 | 0.61269300  |
| H  | -1.74086800 | -3.48210200 | -0.08666500 |
| H  | -2.16015500 | -2.75987400 | 1.46959500  |

|   |             |             |             |
|---|-------------|-------------|-------------|
| N | -2.63933600 | 0.85247000  | -0.64727700 |
| C | -4.89644200 | 1.35174700  | -0.03659500 |
| H | -4.53200500 | -3.57722500 | 1.23191400  |
| H | -4.14082200 | -4.23931900 | -0.36889500 |
| H | -3.38807100 | -4.91248600 | 1.08178500  |
| C | -2.50745000 | 2.09164600  | -1.14098600 |
| C | -4.76038200 | 2.63661800  | -0.55352500 |
| H | -5.82922600 | 1.02057400  | 0.40788700  |
| H | -1.53477700 | 2.32903400  | -1.55833100 |
| C | -3.54301100 | 3.01607800  | -1.11457400 |
| H | -5.59413200 | 3.33114900  | -0.52051400 |
| H | -3.39422200 | 4.00793100  | -1.52650000 |
| N | 0.24630200  | 0.58721100  | -1.21536400 |
| N | 0.71507300  | 0.73082700  | -2.31786600 |
| N | 1.18437000  | 0.90308600  | -3.35925100 |

**(2) Cu<sub>2</sub> (SCN<sup>-</sup>: Side on) : E = -3819768.60380838 a.u.**  
**(S= 2/2)**

|    |             |             |             |
|----|-------------|-------------|-------------|
| N  | -2.56398800 | 2.20965200  | -0.53982600 |
| C  | -2.23402100 | 3.33744600  | -0.66891600 |
| S  | -1.81707500 | 4.89980800  | -0.85336100 |
| Cu | -2.75101300 | 0.29770500  | -0.37244700 |
| N  | -4.51204300 | 0.51428800  | 0.61407800  |
| C  | -5.09369100 | -0.82067500 | 0.84368900  |
| C  | -4.48441100 | 1.36993300  | 1.82658800  |
| H  | -5.08476100 | 0.99405200  | -0.08249900 |
| C  | -4.77301700 | -1.71515300 | -0.32061600 |
| H  | -6.17388100 | -0.77837500 | 1.01339500  |
| H  | -4.63496900 | -1.23331600 | 1.75065700  |
| C  | -5.85839500 | 1.67606200  | 2.40667600  |
| H  | -3.84877500 | 0.86875000  | 2.56196000  |
| H  | -3.97689600 | 2.29196500  | 1.53607000  |
| N  | -3.66543900 | -1.38164300 | -1.00517800 |
| C  | -5.53582700 | -2.82812200 | -0.65934300 |
| H  | -6.36043800 | 0.78249700  | 2.78896100  |
| H  | -5.74841900 | 2.37346300  | 3.24214500  |
| H  | -6.50967600 | 2.14868600  | 1.66346000  |
| C  | -3.27441700 | -2.13975500 | -2.04122300 |
| C  | -5.12967700 | -3.61741100 | -1.73084100 |
| H  | -6.42896700 | -3.06666000 | -0.09162400 |
| H  | -2.37279800 | -1.81768700 | -2.54963800 |
| C  | -3.97996100 | -3.26741000 | -2.43594500 |
| H  | -5.70653000 | -4.49187100 | -2.01524000 |
| H  | -3.63249600 | -3.85331300 | -3.27923200 |
| N  | -1.12782400 | -0.08075300 | -1.33131300 |
| C  | -0.01672900 | -0.24839800 | -1.68102200 |
| S  | 1.51299500  | -0.51206700 | -2.19592100 |
| Cu | 2.82788300  | -0.39986800 | 0.43175700  |
| N  | 4.59702800  | -0.21321500 | -0.54411800 |
| C  | 4.66390500  | 1.12999900  | -1.14800400 |
| C  | 4.93997200  | -1.30814800 | -1.48471100 |
| H  | 5.26939000  | -0.25149400 | 0.22410500  |
| C  | 3.97483300  | 2.11804000  | -0.25022100 |
| H  | 5.69213700  | 1.44168600  | -1.35401300 |
| H  | 4.12920600  | 1.08921300  | -2.10483900 |
| C  | 6.36875400  | -1.25737100 | -2.00791300 |
| H  | 4.76167700  | -2.24087300 | -0.94603700 |
| H  | 4.22248100  | -1.26592500 | -2.30926300 |

|   |             |             |             |
|---|-------------|-------------|-------------|
| N | 3.02002100  | 1.59762600  | 0.54022500  |
| C | 4.26250800  | 3.47895900  | -0.25075200 |
| H | 6.55907900  | -0.37195700 | -2.62129000 |
| H | 7.09391200  | -1.27385700 | -1.18713200 |
| H | 6.55487200  | -2.13604600 | -2.63215700 |
| C | 2.31419800  | 2.40589000  | 1.34600000  |
| C | 3.52996800  | 4.31903000  | 0.58236500  |
| H | 5.04503100  | 3.86728500  | -0.89399900 |
| H | 1.55701600  | 1.92396900  | 1.95405600  |
| C | 2.53833800  | 3.77428300  | 1.39564400  |
| H | 3.73314200  | 5.38519100  | 0.59918500  |
| H | 1.94633400  | 4.39403300  | 2.05922400  |
| N | 3.34025100  | -2.12560300 | 1.11994800  |
| C | 3.40667600  | -3.22468500 | 1.55124100  |
| S | 3.53654200  | -4.73036600 | 2.15353500  |
| N | 1.11161600  | -0.41129700 | 1.29684000  |
| C | -0.01066200 | -0.58050900 | 1.60746600  |
| S | -1.56760500 | -0.79438100 | 2.05938300  |

**(2) Cu<sub>2</sub> (SCN<sup>-</sup>: End on) : E = -3819767.95399887 a.u.**  
**(S= 2/2)**

|    |             |             |             |
|----|-------------|-------------|-------------|
| N  | 0.04058300  | -2.64987600 | -1.05888100 |
| C  | -0.70927900 | -3.55223100 | -1.20486700 |
| S  | -1.71408400 | -4.81418900 | -1.42264200 |
| Cu | 1.01113400  | -1.03787000 | -0.63639700 |
| N  | 2.62033400  | -2.13096100 | -0.04203200 |
| C  | 3.74755300  | -1.21861600 | 0.21707600  |
| C  | 2.37266400  | -3.09931100 | 1.05414300  |
| H  | 2.83086000  | -2.67048300 | -0.88313700 |
| C  | 3.69009000  | -0.05416000 | -0.73158300 |
| H  | 4.71424900  | -1.72674300 | 0.14592700  |
| H  | 3.64861300  | -0.84715400 | 1.24461600  |
| C  | 3.52548000  | -4.06123400 | 1.30839500  |
| H  | 2.14653400  | -2.52023200 | 1.95388200  |
| H  | 1.47050100  | -3.64929500 | 0.77899100  |
| N  | 2.46845300  | 0.24253700  | -1.20991600 |
| C  | 4.81155100  | 0.69900700  | -1.06544700 |
| H  | 4.42353600  | -3.55086500 | 1.66822500  |
| H  | 3.22904400  | -4.78387200 | 2.07412000  |
| H  | 3.78340000  | -4.62247600 | 0.40376500  |
| C  | 2.32031600  | 1.30360500  | -2.01849800 |
| C  | 4.65760100  | 1.79765500  | -1.90456800 |
| H  | 5.78385200  | 0.42660200  | -0.66868400 |
| H  | 1.31227500  | 1.49962900  | -2.36383800 |
| C  | 3.38884400  | 2.10730000  | -2.38911800 |
| H  | 5.51652600  | 2.40239300  | -2.17802900 |
| H  | 3.22364500  | 2.95511100  | -3.04410400 |
| N  | -0.45798700 | 0.12813700  | -1.33963500 |
| C  | -1.04618100 | 0.08450100  | -2.38228900 |
| S  | -1.84857200 | 0.06449600  | -3.77543900 |
| Cu | -1.01111300 | 1.03785000  | 0.63634700  |
| N  | -2.62029000 | 2.13097100  | 0.04198100  |
| C  | -3.74754000 | 1.21865700  | -0.21709700 |

|   |             |             |             |
|---|-------------|-------------|-------------|
| C | -2.37260600 | 3.09929800  | -1.05421100 |
| H | -2.83078600 | 2.67051000  | 0.88308200  |
| C | -3.69009800 | 0.05421300  | 0.73157700  |
| H | -4.71421900 | 1.72681400  | -0.14594300 |
| H | -3.64862600 | 0.84717700  | -1.24463300 |
| C | -3.52537500 | 4.06128800  | -1.30841900 |
| H | -1.47040000 | 3.64923200  | -0.77910100 |
| H | -2.14654800 | 2.52020100  | -1.95395500 |
| N | -2.46846400 | -0.24251600 | 1.20989500  |
| C | -4.81157700 | -0.69891500 | 1.06546800  |
| H | -4.42348200 | 3.55096800  | -1.66819000 |
| H | -3.78320900 | 4.62256200  | -0.40378600 |
| H | -3.22893500 | 4.78389300  | -2.07417400 |
| C | -2.32034900 | -1.30357900 | 2.01848700  |
| C | -4.65765000 | -1.79755800 | 1.90460100  |
| H | -5.78387500 | -0.42648500 | 0.66871600  |
| H | -1.31230900 | -1.49962900 | 2.36381600  |
| C | -3.38889600 | -2.10723600 | 2.38913400  |
| H | -5.51658900 | -2.40226400 | 2.17808300  |
| H | -3.22371200 | -2.95504300 | 3.04412800  |
| N | -0.04055000 | 2.64984800  | 1.05884600  |
| C | 0.70927600  | 3.55221100  | 1.20492900  |
| S | 1.71403600  | 4.81417900  | 1.42281500  |
| N | 0.45798100  | -0.12817100 | 1.33961300  |
| C | 1.04616400  | -0.08456100 | 2.38227200  |
| S | 1.84853800  | -0.06459400 | 3.77543200  |
